# Supplementary material
Source: PubMed Central journal article supplement (PMC3100203)

# Supplemental figure 1

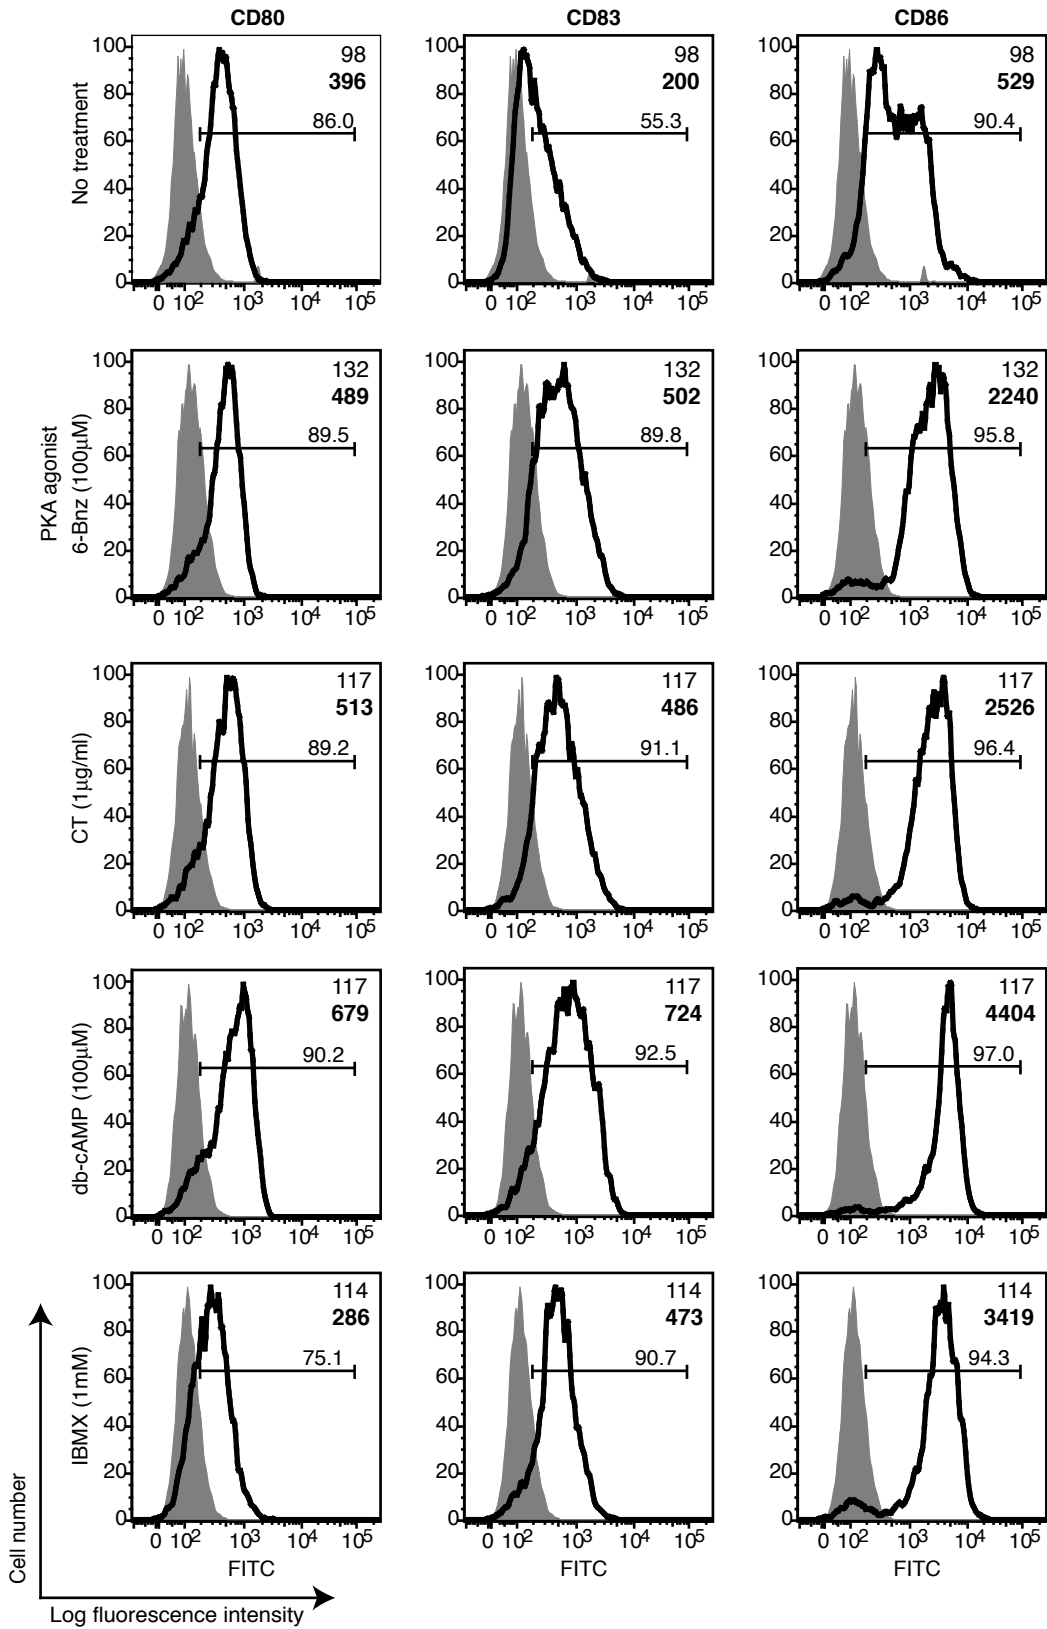

## Supplemental figure 2

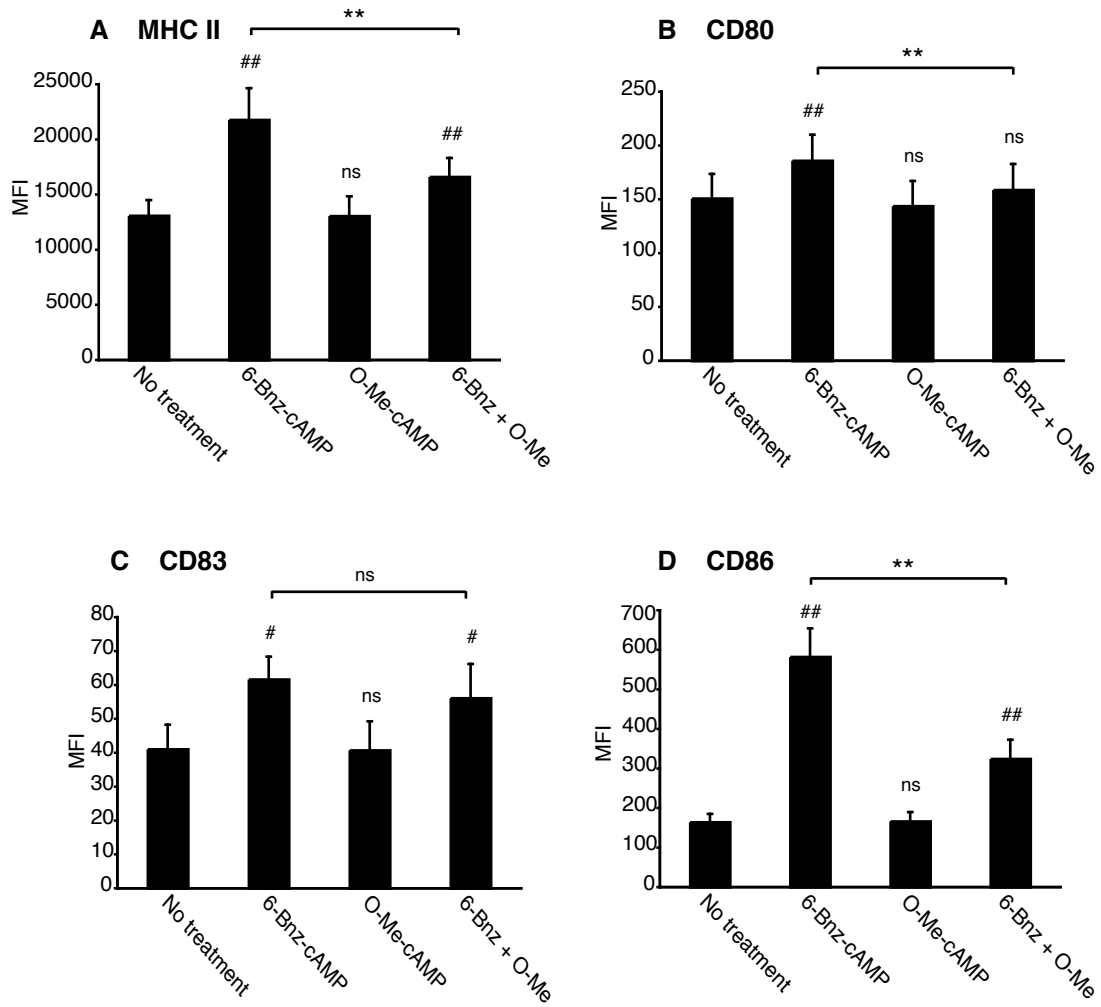

### Supplemental figure 3

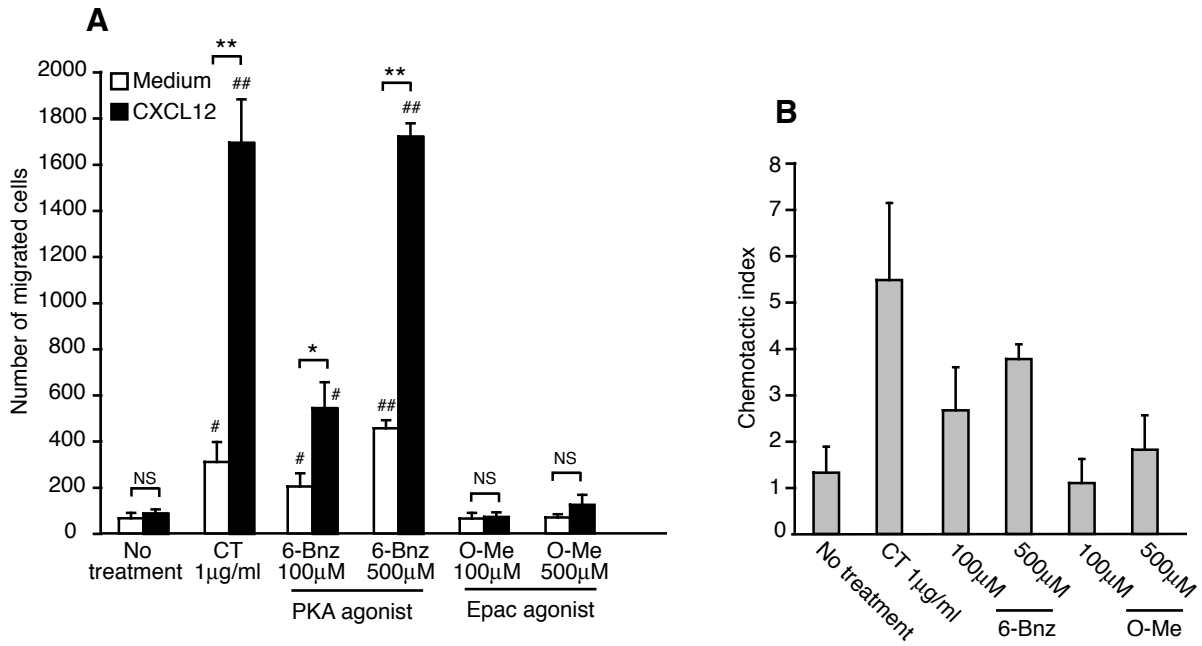

Supplemental figure 4

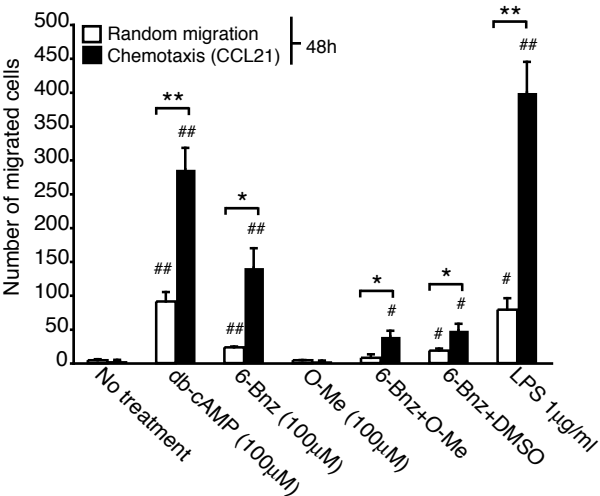

## Supplemental figure 5

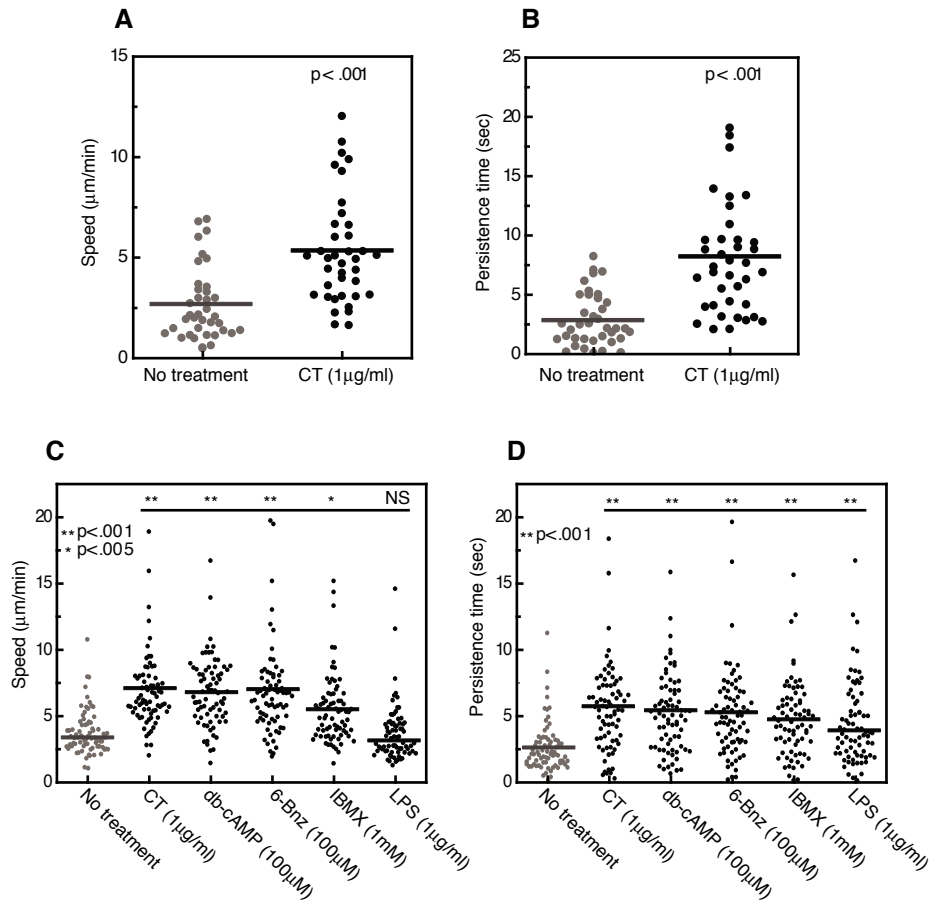

## Supplemental figure 6

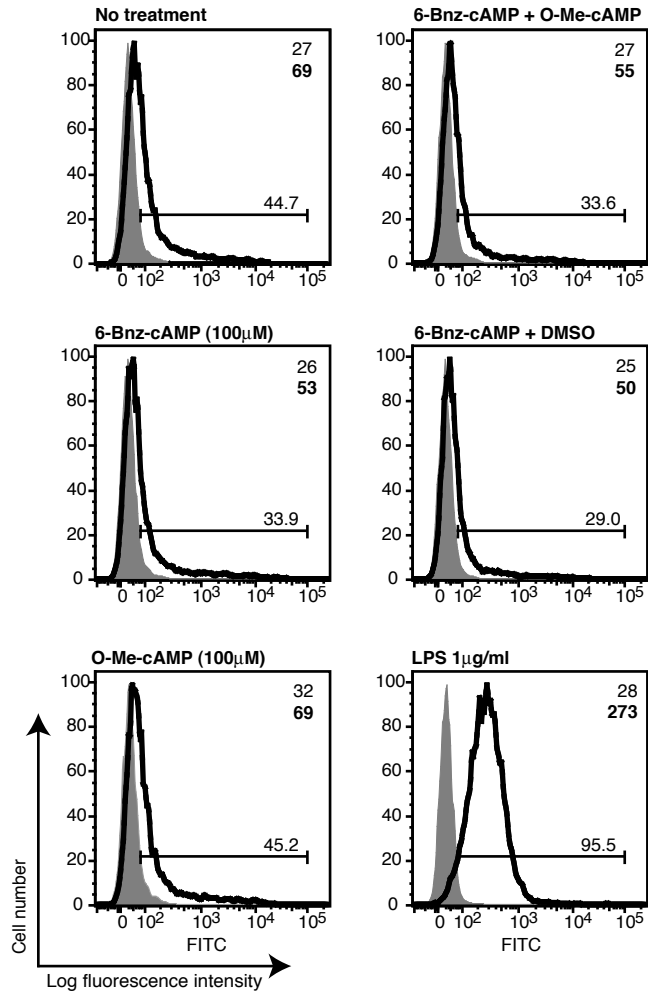

Supplement: NIHMS222128-supplement-supplement_1.pdf [file NIHMS222128-supplement-supplement_1.pdf]
